# Supplementary material
Source: HighWire-hosted journal article supplement (https://www.cmaj.ca/highwire/filestream/72154/field_highwire_adjunct_files/7/181644-res-8-at.pdf)
Supplement: 181644-res-8-at.pdf [file 181644-res-8-at.pdf]

**Appendix 8 (as supplied by the authors): Sensitivity analysis of methylprednisolone vs placebo on the risk of acute kidney injury; excludes 1404 non-elective surgeries<sup>a</sup> (N = 5882)**

|                                                        | Number of events                 |                       | Relative Risk (95% CI)  |                       |                             |
|--------------------------------------------------------|----------------------------------|-----------------------|-------------------------|-----------------------|-----------------------------|
|                                                        | Methylprednisolone<br>(n = 2936) | Placebo<br>(n = 2946) | Unadjusted <sup>b</sup> | Adjusted <sup>c</sup> | <i>p</i> value <sup>d</sup> |
| Primary definition of acute kidney injury <sup>e</sup> | 1174 (40.0%)                     | 1143 (38.8%)          | 1.03 (0.97 to 1.10)     | 1.03 (0.95 to 1.12)   | 0.4                         |

<sup>a</sup> Non-elective surgery was defined based on evidence of preoperative use of inotropes, vasopressors, an intra-aortic balloon pump, or a ventricular assist device, or myocardial infarction in the 30 days before surgery.

<sup>b</sup> Analyzed using modified Poisson regression without adjustment for covariates or accounting for centre.

<sup>c</sup> Adjusted for 9 prespecified covariates (defined in supplementary table S3; not adjusted for the non-elective surgery covariate). Missing data on left ventricular ejection fraction was imputed using multiple imputation as described in supplementary appendix S1.

<sup>d</sup> *P* value from the adjusted model.

<sup>e</sup> Defined as an increase in serum creatinine concentration of 0.3 mg/dL or more ( $\geq 26.5$   $\mu\text{mol/L}$ ) or 50% or more from the preoperative value within 14 days of surgery, or receipt of dialysis within 30 days of surgery.
